# Supplementary material
Source: MDPI journal article supplement (https://www.mdpi.com/2073-4344/7/4/122)
Supplement: s1 [file s1]

## Supplementary Materials: Promotive Effect of $\text{Sn}^{2+}$ on $\text{Cu}^0/\text{Cu}^+$ Ratio and Stability Evolution of $\text{Cu}/\text{SiO}_2$ Catalyst in the Hydrogenation of Dimethyl Oxalate

ChuanCai Zhang, Denghao Wang and Bin Dai

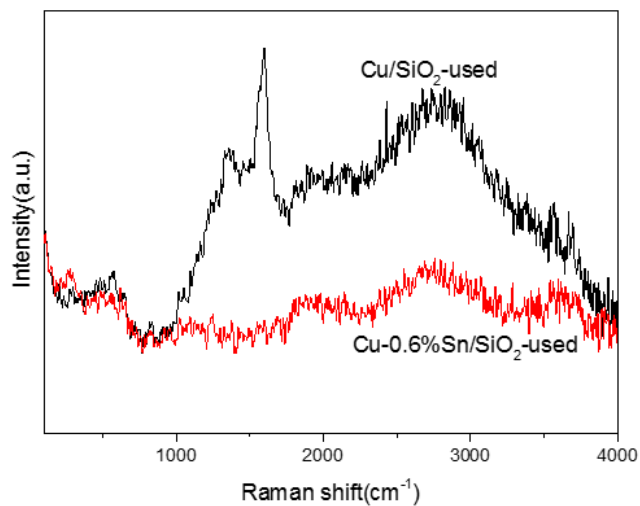

**Figure S1.** The Raman spectrum of the  $\text{Cu}/\text{SiO}_2$ -used catalyst and  $\text{Cu-0.6\%Sn}/\text{SiO}_2$ -used catalysts.
